# Supplementary material
Source: PubMed Central journal article supplement (PMC3863710)

**Supplementary Figure 5.** Linkage disequilibrium plot showing  $r^2$ -values and  $D'$ -values for selected variants on chromosome 13 (A, B), chromosome 14 (C, D), chromosome 16 (E, F), chromosome 17 (G, H), and chromosome 18 (I, J)

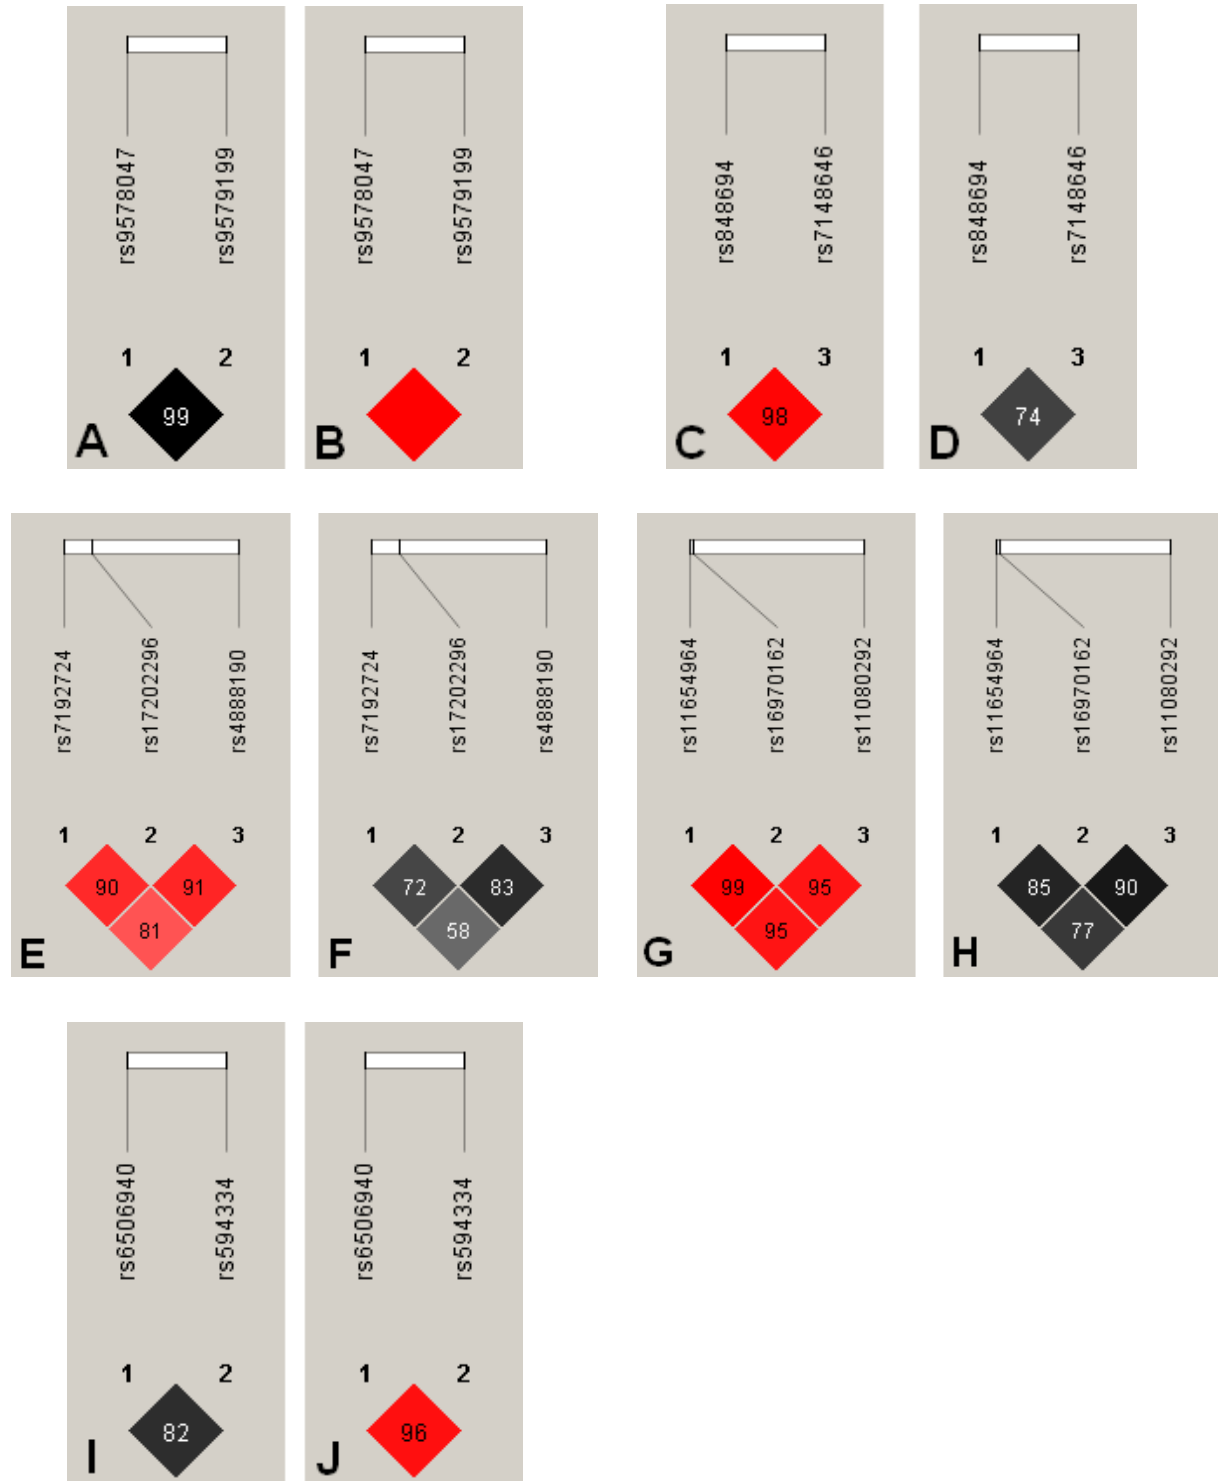

Supplement: NIHMS529599-supplement-5.pdf [file NIHMS529599-supplement-5.pdf]
