# Supplementary material
Source: PubMed Central journal article supplement (PMC3863710)

**Supplementary Figure 6.** Forest plot for SNPxHRT interactions regarding overall breast cancer risk by study for (A) rs9578047, (B) rs9579199, (C) rs7148646, (D) rs848694, (E) rs7192724, (F) rs17202296, and (G) rs4888190

**A rs9578047**

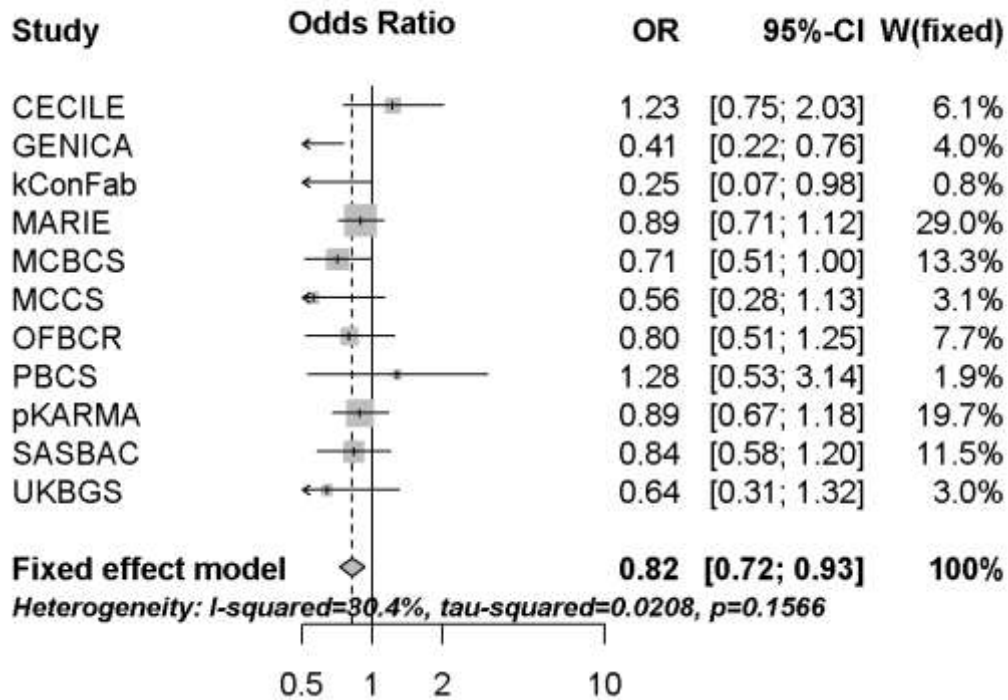

**B rs9579199**

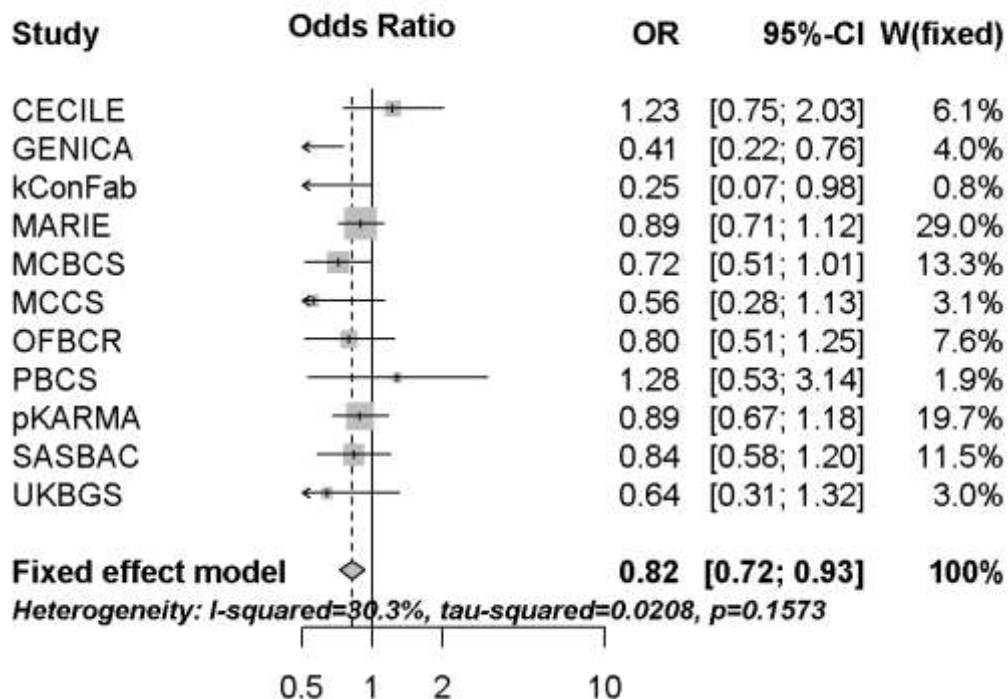

**C** rs7148646

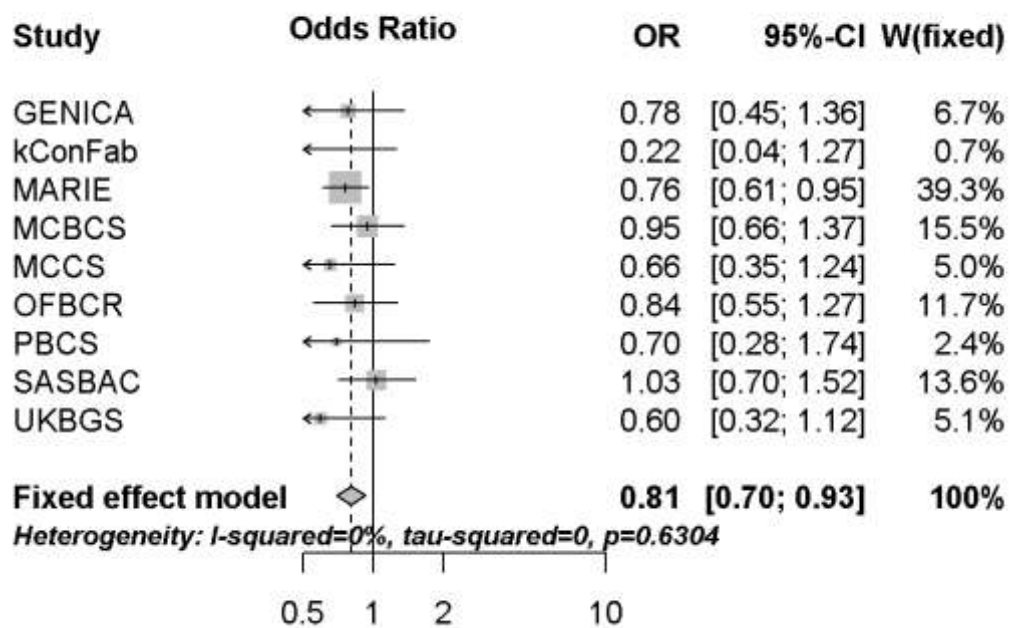

**D** rs848694

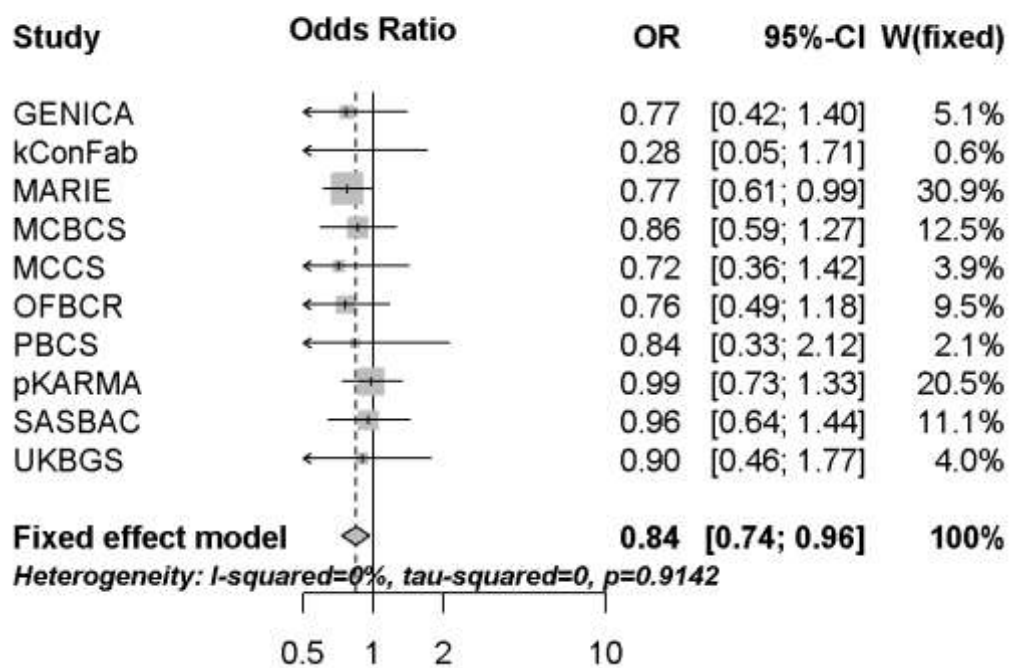

**E** rs7192724

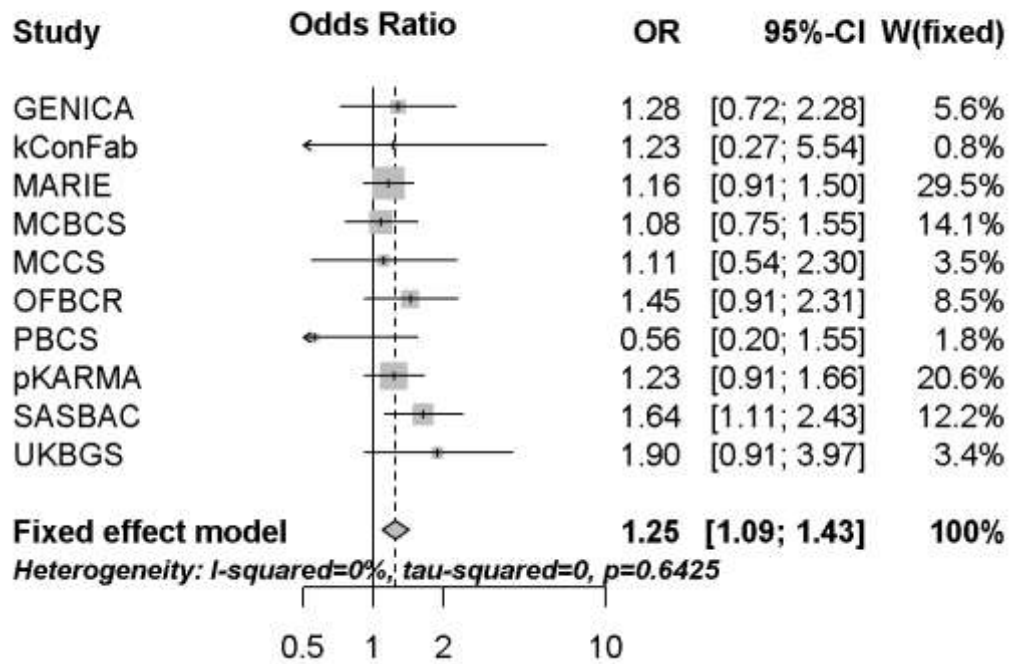

**F** rs17202296

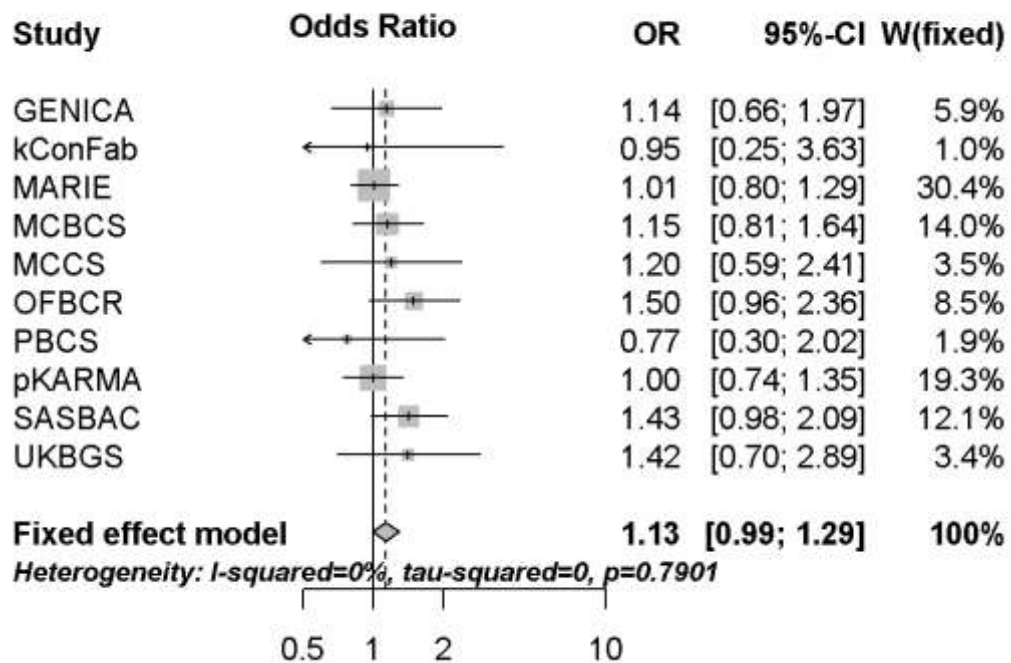

**G** rs4888190

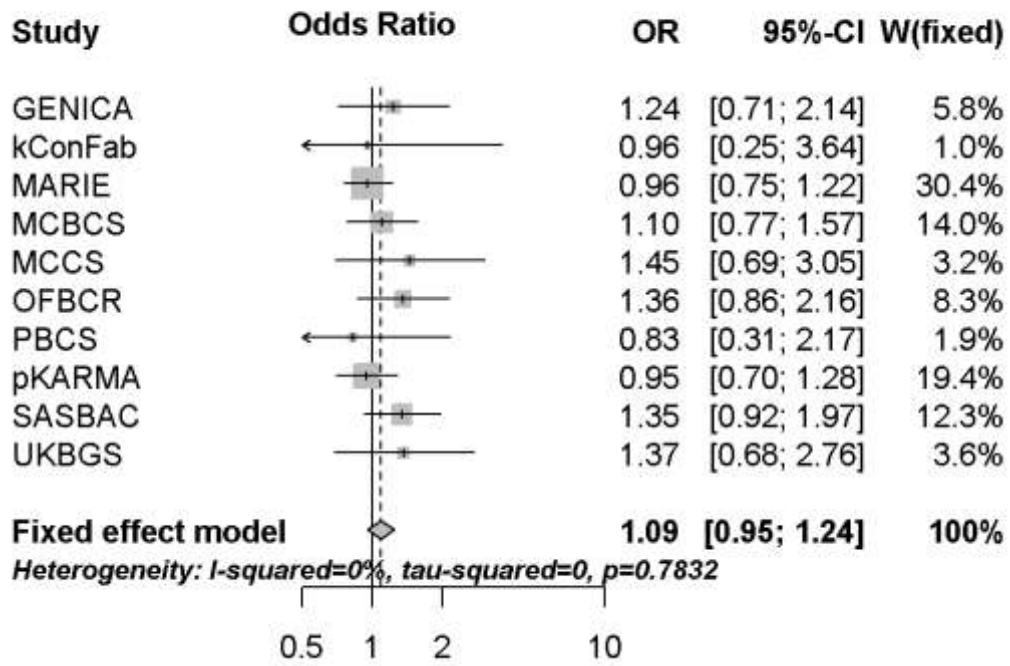

Supplement: NIHMS529599-supplement-6.pdf [file NIHMS529599-supplement-6.pdf]
