# Supplementary material
Source: PubMed Central journal article supplement (PMC3863710)

**Supplementary Figure 7.** Forest plot for SNPxHRT interactions regarding lobular breast cancer risk by study for (A) rs11680872, (B) rs7648642, (C) rs11654964, (D) rs16970162, (E) rs11080292, (F) rs6506940, and (G) rs594334

**A rs11680872**

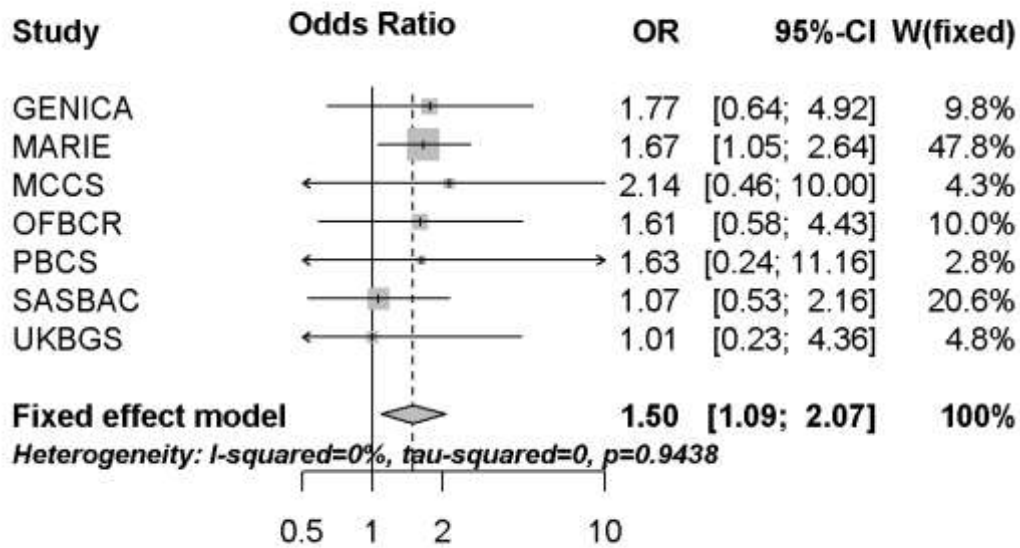

**B rs7648642**

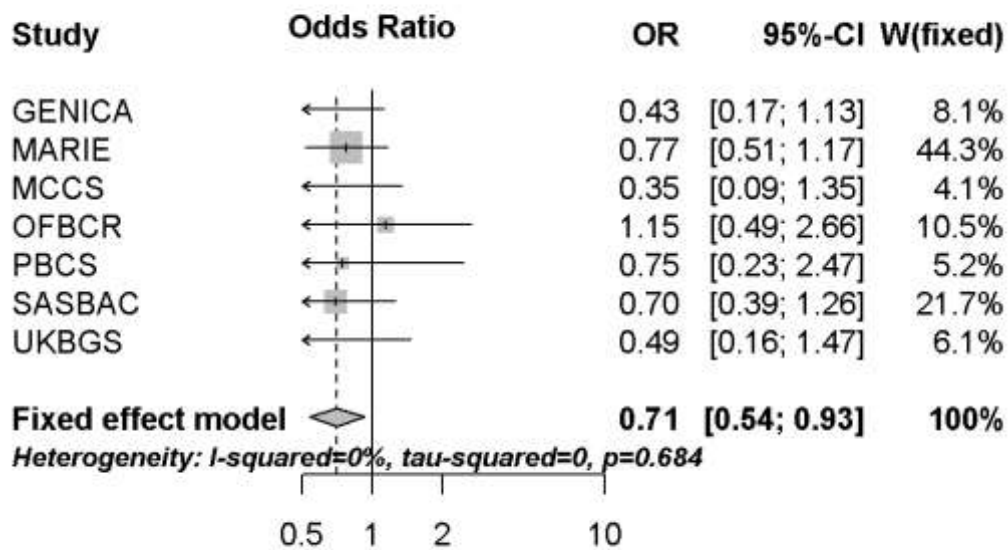

**C** rs11654964

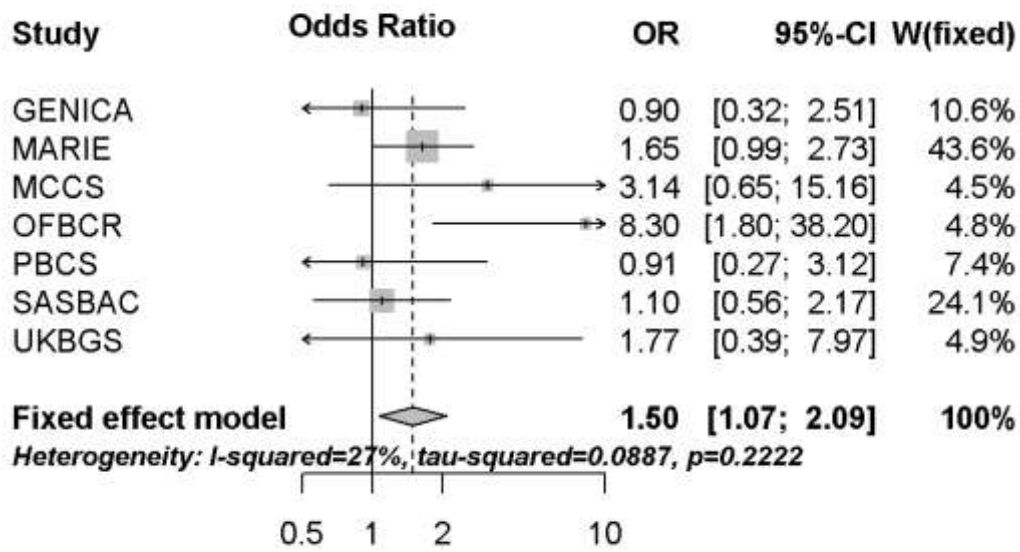

**D** rs16970162

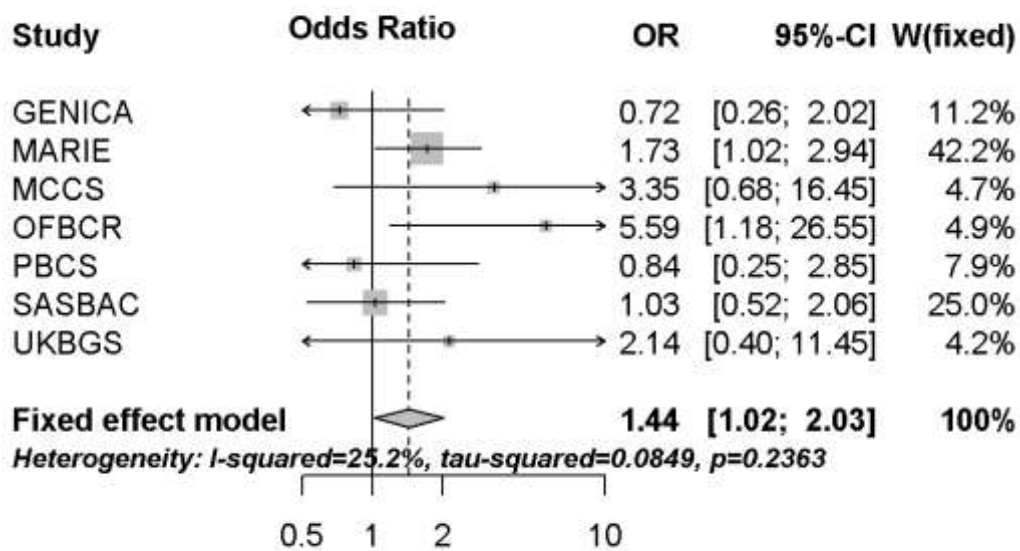

**E** rs11080292

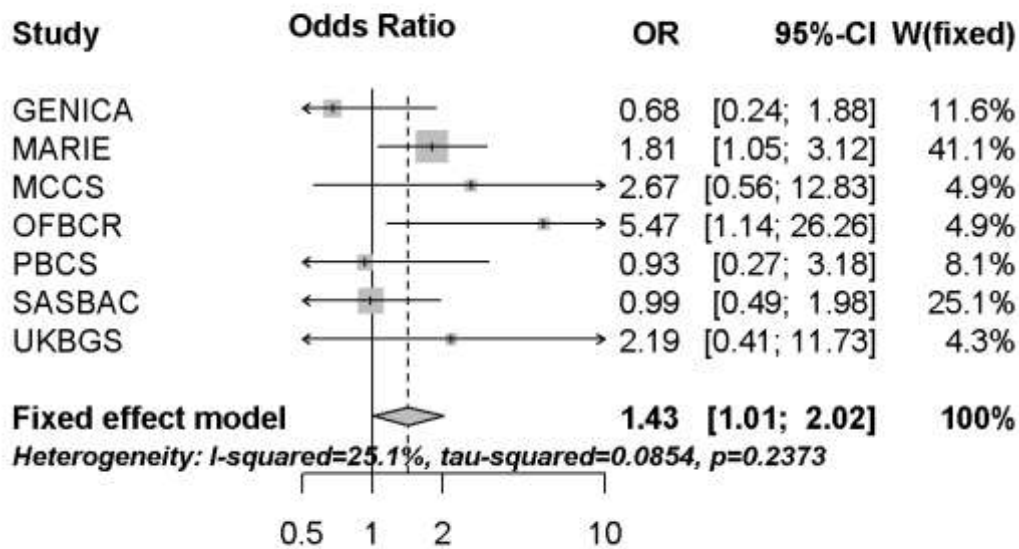

**F** rs6506940

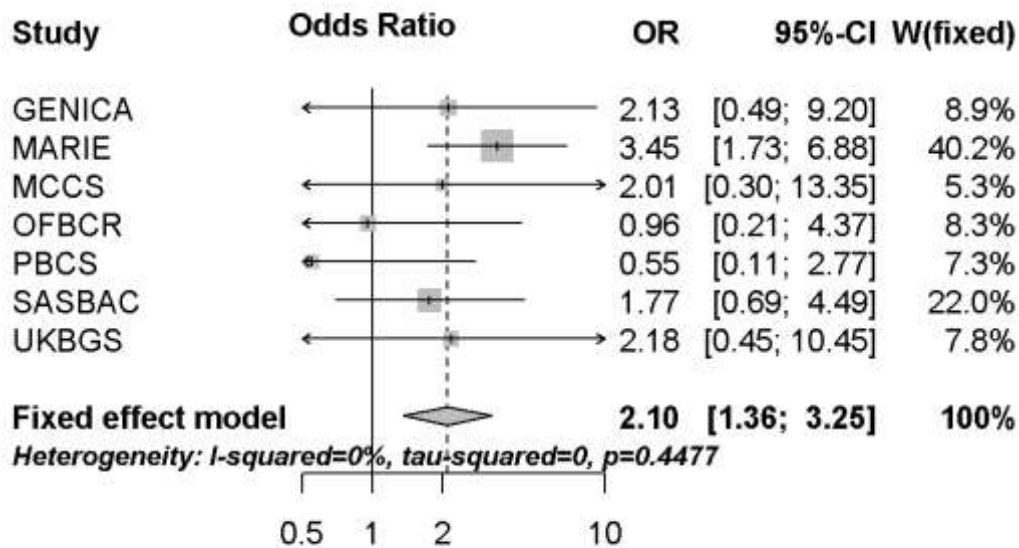

**G** rs594334

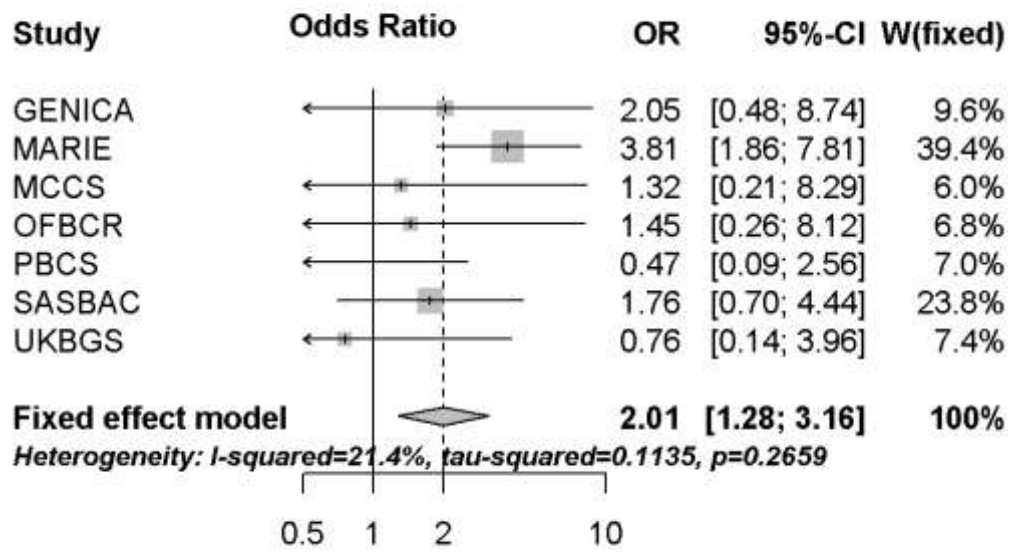

Supplement: NIHMS529599-supplement-7.pdf [file NIHMS529599-supplement-7.pdf]
